# Supplementary material for: Seasonal variation in D2/3 dopamine receptor availability in the human brain
Source: Springer Nature journal article supplement (doi:10.1007/s00259-024-06715-9), 2024-05-10
Supplement: MOESM1 [file 27078664]

## Supplementary data

### Seasonal variation in D2/3 dopamine receptor availability in the human brain

Lihua Sun<sup>1,2,3</sup>, Tuulia Malén<sup>2,3</sup>, Jouni Tuisku<sup>2,3</sup>, Valtteri Kaasinen<sup>4,5</sup>, Jarmo A. Hietala<sup>2,3,6</sup>,  
Juha Rinne<sup>2,3</sup>, Pirjo Nuutila<sup>2,3,7</sup>, Lauri Nummenmaa<sup>2,3,8</sup>

1. Huashan Institute of Medicine, Huashan Hospital, Fudan University, Shanghai, China
2. Turku PET Centre, University of Turku, Turku, Finland
3. Turku PET Centre, Turku University Hospital, Turku, Finland
4. Clinical Neurosciences, University of Turku, Turku, Finland
5. Neurocenter, Turku University Hospital, Turku, Finland
6. Department of Psychiatry, University of Turku and Turku University Hospital, Turku, Finland
7. Department of Endocrinology, Turku University Hospital, Finland
8. Department of Psychology, University of Turku, Turku, Finland

Corresponding to:

Lihua Sun, [lihua.sun@utu.fi](mailto:lihua.sun@utu.fi)

Turku PET Centre, University of Turku

Turku, Finland

**Supplementary Table S1.** Physical properties have been measured at different times (years 1988-2020) and the measurement standards have slightly changed. The default for radial and tangential average, as well as axial resolution is 1 cm offset. <sup>a</sup> Average resolution (mm FWHM), <sup>b</sup> R0= centre of field of view, <sup>c</sup> Result is in [kcps/kBq/ml] NECR. FWHM= Full width half maximum; FOV= Field of view, FBP= filtered back projection. Reference articles are listed for the data.

| <b>Scanners</b>                    | <b>S1 (Ecat 931)</b>              | <b>S2 (GE Advance)</b>    | <b>S3 (HRRT)</b>    | <b>S4 (HR+)</b>           | <b>S5 (VCT PET CT)</b> | <b>S6 (690 PET CT)</b> |
|------------------------------------|-----------------------------------|---------------------------|---------------------|---------------------------|------------------------|------------------------|
| Radial and tangential <sup>a</sup> | 10.8 [1]                          | 5                         | 2.5                 | 4.4 [2]                   | 5                      | 4.7 [3]                |
| Axial <sup>a</sup>                 | 10.8 [1]                          | 6.6                       | 2.5                 | 5.1 [2]                   | 4.4 [4]                | 4.74 [3]               |
| Crystal material                   | BGO                               | BGO [5]                   | LSO, GSO [6]        | BGO                       | BGO [4]                | LYSO                   |
| Crystal size (mm <sup>3</sup> )    | 6.1x12.5x30                       | 4.0x8.1x30 [5]            | 2.1x2.1x7.5 [6]     | 4.2x4.39x30               | 4.7x6.3x30             | 4.2x6.3x25             |
| Sensitivity (cps/kBq)              | 6                                 | 6.41                      | 39.8 <sup>c</sup>   | 6.65                      | 8.8 <sup>b</sup> [4]   | 7.4                    |
| Axial FOV                          | 108 [1]                           | 152 [5]                   | 252 [6]             | 155 [7]                   | 157 [4]                | 157 [3]                |
| Patient port diameter (mm)         | 600 [1]                           | 590 [5]                   | 350 [6]             | 562 [7]                   | 700 [4]                | 700 [3]                |
| Time-Of-Flight                     | No                                | No                        | No                  | No                        | No                     | Yes                    |
| Depth of interaction               | No                                | No                        | Yes                 | No                        | No                     | No                     |
| Reconstruction                     | FBP                               | FBP [5]                   | FORE/HOSP/FBP       | FBP, PROMIS [7]           | FBP, 2D-3D OSEM        | PSF, 3D-OSEM           |
| Attenuation correction method      | Ge-68 filled portable ring source | Ge-68 rotating rod source | Cs-137 point source | Ge-68 rotating rod source | Computed tomography    | Computed tomography    |

**Supplementary Table S2.** Injection information (mean, standard deviation, range) of the radiochemical purity, activity, molar activity, and product mass in the sample. Information is available for 195 out of the total 291 scans, and is presented separately for the studies using single-bolus and bolus-infusion. Note that for some scanners (HRRT and HR+), the injected activity is significantly higher compared with other scanners, which explains the high range and variation in injected activity. MBq= megabecquerel, nmol= nanomol, ug = microgram.

|                           | <b>Bolus (n= 142)</b> | <b>Bolus + infusion (n= 53)</b> |                     |
|---------------------------|-----------------------|---------------------------------|---------------------|
| Radiochemical purity (%)  | 99.3, 0.4, 98.1-99.9  | 99.3, 0.24, 98.7-99.7           |                     |
|                           |                       | Bolus                           | Infusion            |
| Activity (MBq)            | 238, 76, 119-538      | 238, 34, 134-285                | 247, 37, 158-314    |
| Molar Activity (MBq/nmol) | 186, 242, 5-1466      | 338, 228, 8-1483                | 330, 225, 8-1457    |
| Product Mass (ug)         | 2.1, 3.0, 0.05-19.6   | 0.5, 1.5, 0.06-11.3             | 0.6, 1.6, 0.06-11.6 |

**Supplementary Table S3.** Basic information of the primary sample.

| Scanner<br>Types | Sex | Age         |             |            |            | Daylength   |             |            |            | N  |
|------------------|-----|-------------|-------------|------------|------------|-------------|-------------|------------|------------|----|
|                  |     | <i>mean</i> | <i>s.d.</i> | <i>min</i> | <i>max</i> | <i>mean</i> | <i>s.d.</i> | <i>min</i> | <i>max</i> |    |
| S1               | M   | 24.62       | 5.11        | 19.24      | 34.68      | 14.8        | 3.08        | 9.12       | 19.66      | 13 |
| S2               | M   | 26.8        | 5.12        | 19.43      | 38.75      | 14.34       | 3.89        | 7.73       | 22.5       | 61 |
| S3               | M   | 23.58       | 3.25        | 19.22      | 36.17      | 13.23       | 3.99        | 7.71       | 23.25      | 88 |
| S4               | M   | 22.9        | 4.07        | 18.87      | 35.58      | 10.76       | 3.3         | 7.79       | 22.89      | 18 |
| S5               | M   | 27.46       | 5.39        | 20.55      | 37.03      | 14.9        | 5.47        | 7.7        | 22.9       | 15 |
| S1               | F   | 31.06       | 9.03        | 19.47      | 39.47      | 14.33       | 6.17        | 8.3        | 22.76      | 8  |
| S2               | F   | 26.28       | 3.36        | 20.1       | 30.33      | 15.19       | 6.16        | 8.53       | 23.08      | 8  |
| S3               | F   | 26.79       | 2.49        | 25.07      | 32.69      | 14.79       | 5.07        | 9.93       | 22.51      | 8  |
| S4               | F   | 18.82       | -           | 18.82      | 18.82      | 11.88       | -           | 11.88      | 11.88      | 1  |
| S6               | F   | 26.94       | 6.34        | 19.82      | 39.12      | 10.83       | 3.1         | 8.19       | 17.49      | 7  |

N = number of subjects, M = male, F = female, s.d. = standard deviation, min = minimum, max = maximum

**Supplementary Table S4.** Basic information of the full sample.

| Scanner<br>Types | Sex | Age         |             |            |            | Daylength   |             |            |            | N  |
|------------------|-----|-------------|-------------|------------|------------|-------------|-------------|------------|------------|----|
|                  |     | <i>mean</i> | <i>s.d.</i> | <i>min</i> | <i>max</i> | <i>mean</i> | <i>s.d.</i> | <i>min</i> | <i>max</i> |    |
| S1               | M   | 40.14       | 19.65       | 19.24      | 78.4       | 14.95       | 3.84        | 9.12       | 23.09      | 23 |
| S2               | M   | 31.89       | 10.83       | 19.43      | 57.78      | 14.4        | 4.03        | 7.72       | 22.5       | 78 |
| S3               | M   | 23.58       | 3.25        | 19.22      | 36.17      | 13.23       | 3.99        | 7.71       | 23.25      | 88 |
| S4               | M   | 22.9        | 4.07        | 18.87      | 35.58      | 10.76       | 3.3         | 7.79       | 22.89      | 18 |
| S5               | M   | 29.57       | 7.83        | 20.55      | 47.12      | 14.34       | 5.4         | 7.7        | 22.9       | 17 |
| S1               | F   | 48.76       | 17.05       | 19.47      | 81.62      | 15.84       | 5.38        | 8.3        | 23.28      | 21 |
| S2               | F   | 40.64       | 16.25       | 20.1       | 70.76      | 13.97       | 5.41        | 8.53       | 23.13      | 16 |
| S3               | F   | 30.26       | 10.67       | 25.07      | 58.02      | 14.39       | 4.89        | 9.93       | 22.51      | 9  |
| S4               | F   | 18.82       | NA          | 18.82      | 18.82      | 11.88       | NA          | 11.88      | 11.88      | 1  |
| S6               | F   | 42.2        | 13.02       | 19.82      | 58.67      | 13.08       | 5.13        | 8.19       | 22.92      | 20 |

N.B., N = number of subjects, M = male, F = female, s.d. = standard deviation, min = minimum, max = maximum

**Supplementary Table S5.** Effect of daylength on regional D2R availability in the full sample (uncorrected for multiple comparison).

| Hem   | Region   | Beta    | 95% CI           | t     | p        |
|-------|----------|---------|------------------|-------|----------|
| Left  | Caudate  | -0.018  | -0.031, -0.0051  | -2.74 | 0.0066** |
| Right | Caudate  | -0.014  | -0.027, -0.00012 | -1.97 | 0.049*   |
| Left  | Putamen  | -0.0077 | -0.019, 0.0034   | -1.35 | 0.18     |
| Right | Putamen  | -0.010  | -0.022, 0.00095  | -1.79 | 0.074    |
| Left  | NACC     | -0.013  | -0.028, 0.0019   | -1.70 | 0.090    |
| Right | NACC     | -0.011  | -0.027, 0.0044   | -1.40 | 0.16     |
| Left  | Thalamus | -0.010  | -0.033, 0.012    | -0.91 | 0.37     |
| Right | Thalamus | -0.0036 | -0.024, 0.016    | -0.36 | 0.72     |

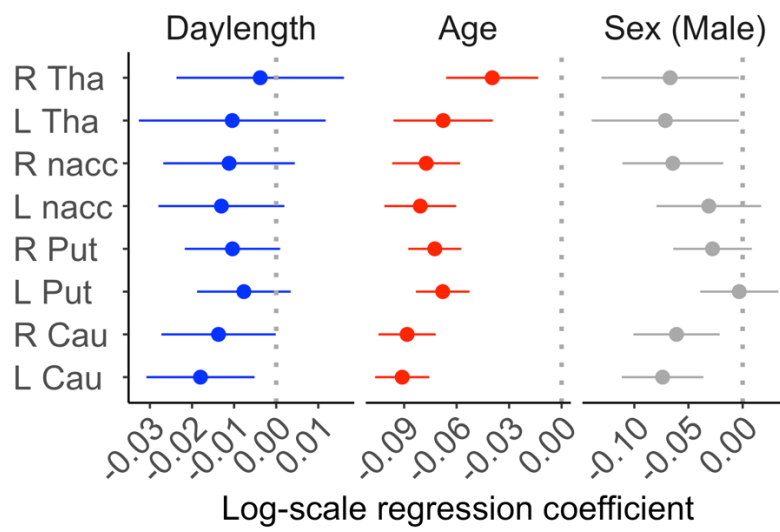

**Supplementary Figure S1.** Effect sizes of daylength, age and sex (male) on D2R BP<sub>ND</sub> in different brain regions in the full sample. L = Left, R = Right, Cau = Caudate, Put = Putamen, nacc = Nucleus accumbens, Tha = Thalamus.

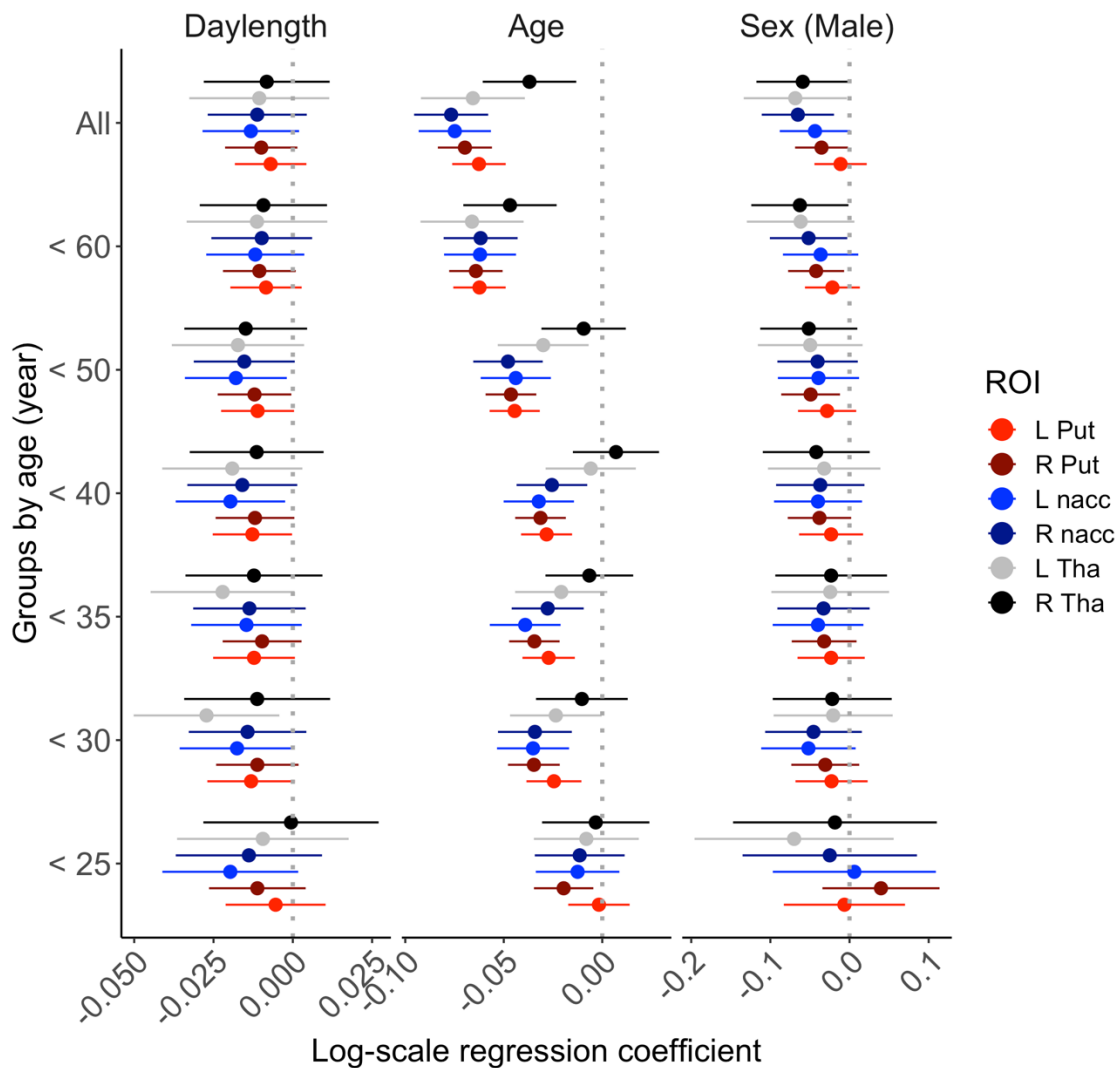

**Supplementary Figure S2.** Effect sizes for daylength, age and sex (male) on D2R BP<sub>ND</sub> in different groups defined by maximum age. ROI = region of interest.

### References

1. Dahlbom M, Hoffman E, Hoh C, Schiepers C, Rosenqvist G, Hawkins R, et al. Whole-body positron emission tomography: Part I. Methods and performance characteristics. *Journal of Nuclear Medicine*. 1992;33:1191-9.
2. Herzog H, Tellmann L, Hocke C, Pietrzyk U, Casey ME, Kuwert T. NEMA NU2-2001 guided performance evaluation of four Siemens ECAT PET scanners. *IEEE Transactions on Nuclear Science*. 2004;51:2662-9.
3. Bettinardi V, Presotto L, Rapisarda E, Picchio M, Gianolli L, Gilardi M. Physical Performance of the new hybrid PET/CT Discovery-690. *Medical physics*. 2011;38:5394-411.
4. Teräs M, Tolvanen T, Johansson J, Williams J, Knuuti J. Performance of the new generation of whole-body PET/CT scanners: Discovery STE and Discovery VCT. *European journal of nuclear medicine and molecular imaging*. 2007;34:1683-92.
5. DeGrado TR, Turkington TG, Williams JJ, Stearns CW, Hoffman JM, Coleman RE. Performance characteristics of a whole-body PET scanner. *J Nucl Med*. 1994;35:1398-406.

6. Schmand M, Eriksson L, Casey M, Andreaco M, Melcher C, Wienhard K, et al. Performance results of a new DOI detector block for a high resolution PET-LSO research tomograph HRRT. IEEE Transactions on Nuclear Science. 1998;45:3000-6.
7. Brix G, Zaers J, Adam LE, Bellemann ME, Ostertag H, Trojan H, et al. Performance evaluation of a whole-body PET scanner using the NEMA protocol. National Electrical Manufacturers Association. J Nucl Med. 1997;38:1614-23.
